# Supplementary material for: Presenting Precision Glycomacromolecules on Gold Nanoparticles for Increased Lectin Binding
Source: PubMed Central journal article supplement (PMC6418785; doi:10.3390/polym9120716), 2017-12-14
Supplement: polymers-09-00716-s001.pdf [file polymers-09-00716-s001.pdf]

Supporting Information

# Presenting Precision Glycomacromolecules on Gold Nanoparticles for Increased Lectin Binding

Sophia Boden <sup>1</sup>, Kristina G. Wagner <sup>2</sup>, Matthias Karg <sup>2</sup> and Laura Hartmann <sup>1,\*</sup>

<sup>1</sup> Institute of Organic Chemistry and Macromolecular Chemistry, Heinrich-Heine-University Düsseldorf, Universitätsstraße 1, 40225 Düsseldorf, Germany; Laura.Hartmann@hhu.de

<sup>2</sup> Institute of Physical Chemistry, Heinrich-Heine-University Düsseldorf, Universitätsstraße 1, 40225 Düsseldorf, Germany; Matthias.Karg@hhu.de

\* Correspondence: Laura.Hartmann@hhu.de; Tel.: +49-211-81-10360

## 1. Synthesis of Thiol Functionalized Precision Glycomacromolecules

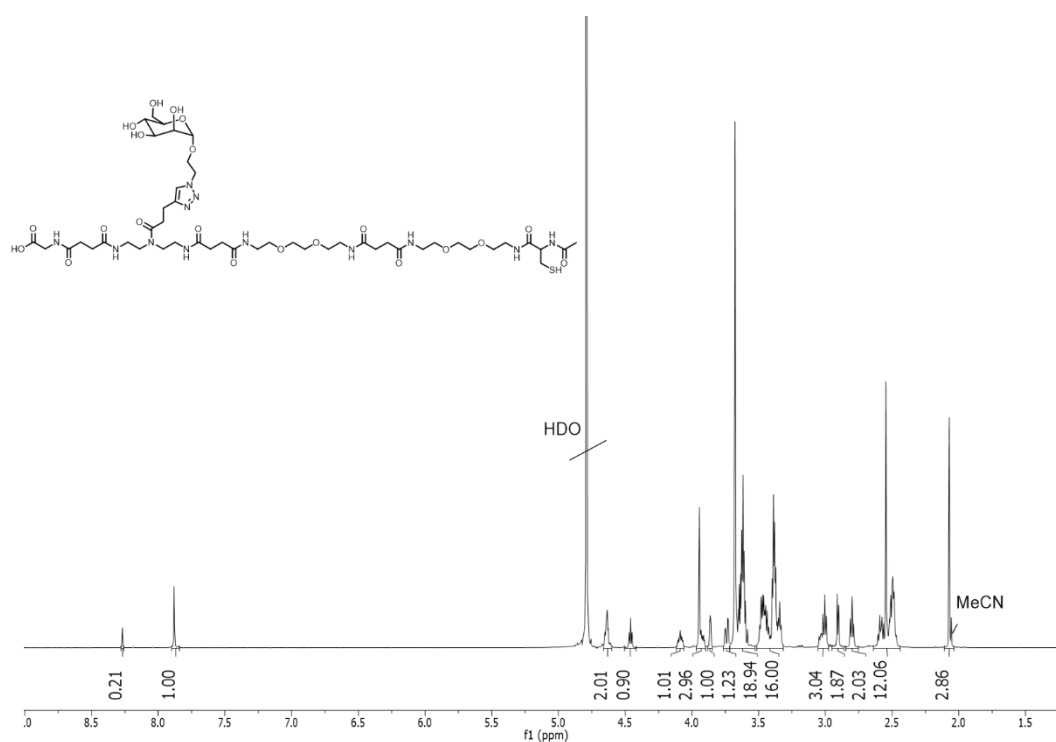

Figure S1. <sup>1</sup>H-NMR (600 MHz, D<sub>2</sub>O) of glycomacromolecule 1.

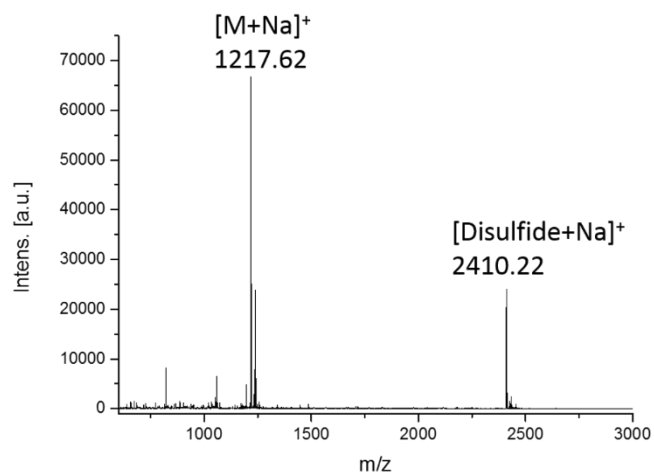

Figure S2. MALDI-TOF-MS spectrum of glycomacromolecule 1.

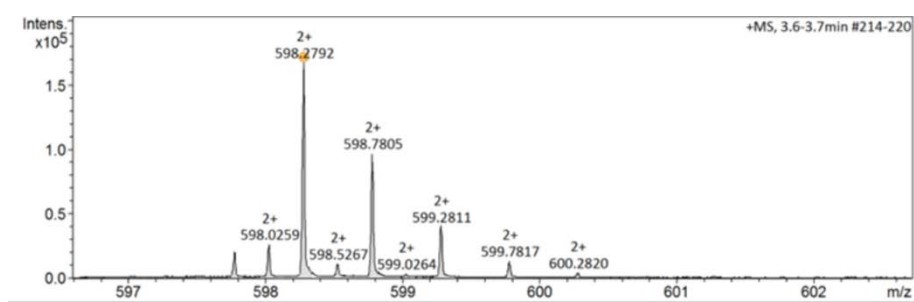

Figure S3. HR-MS (ESI<sup>+</sup> Q-TOF) of glycomacromolecule 1.

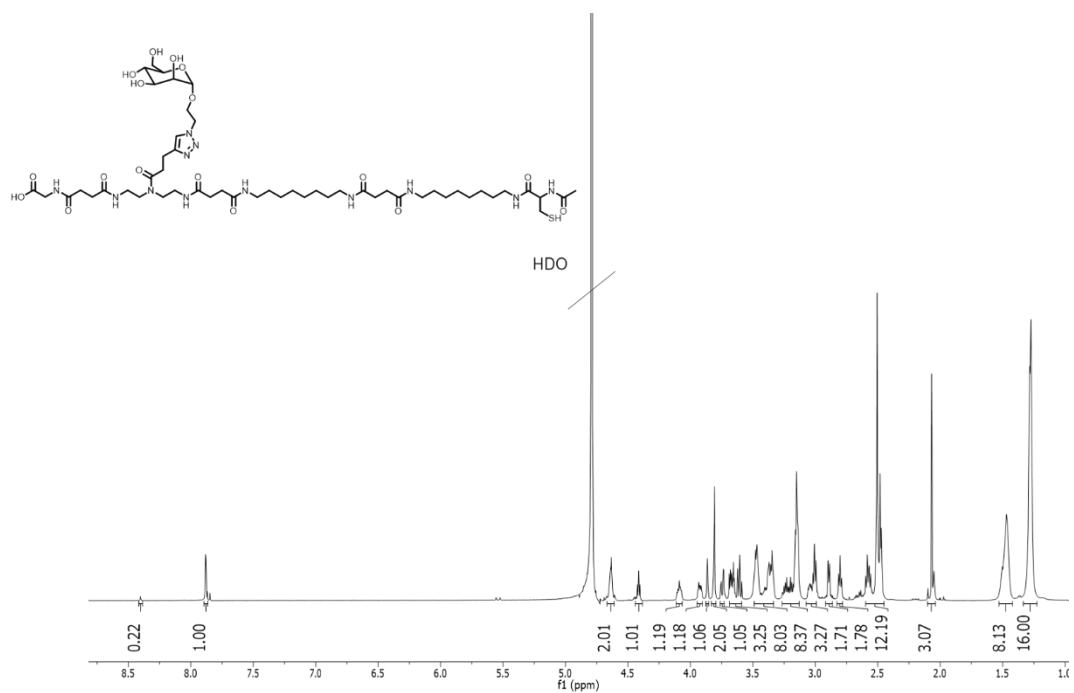

Figure S4. <sup>1</sup>H-NMR (600 MHz, D<sub>2</sub>O) of glycomacromolecule 2.

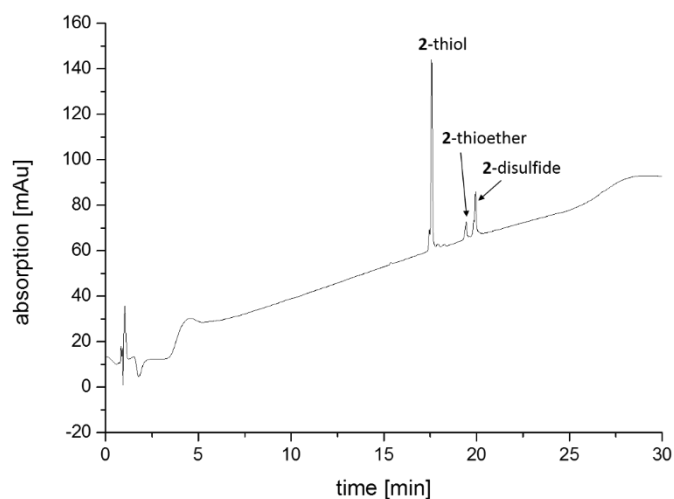

**Figure S5.** HPLC spectrum (95/5 H<sub>2</sub>O/MeCN with 0.1% formic acid (A) and 5/95 H<sub>2</sub>O/MeCN with 0.1% formic acid (B); 100% A to 50% A in 30min) determined at 214 nm of glycomacromolecule 2 showing the thioether side product formation.

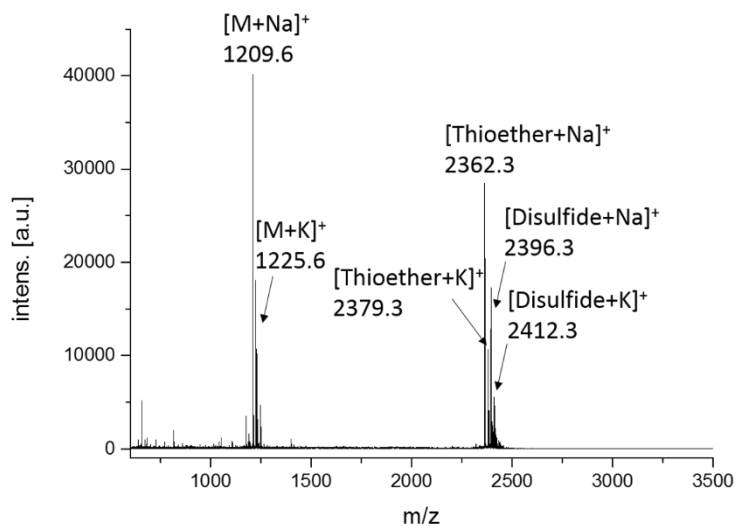

**Figure S6.** MALDI-TOF-MS spectrum of glycomacromolecule 2 showing the thioether side product formation.

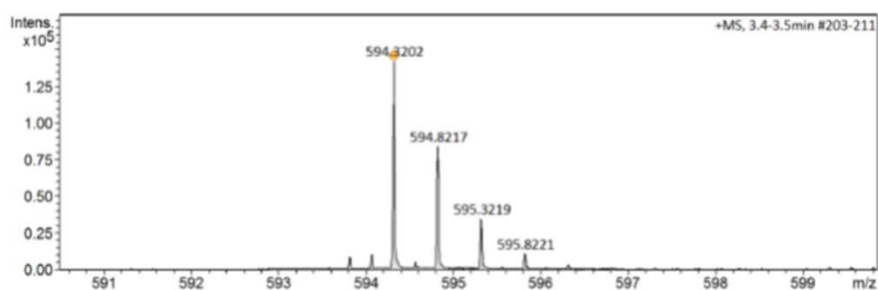

**Figure S7.** HR-MS (ESI<sup>+</sup> Q-TOF) of glycomacromolecule 2.

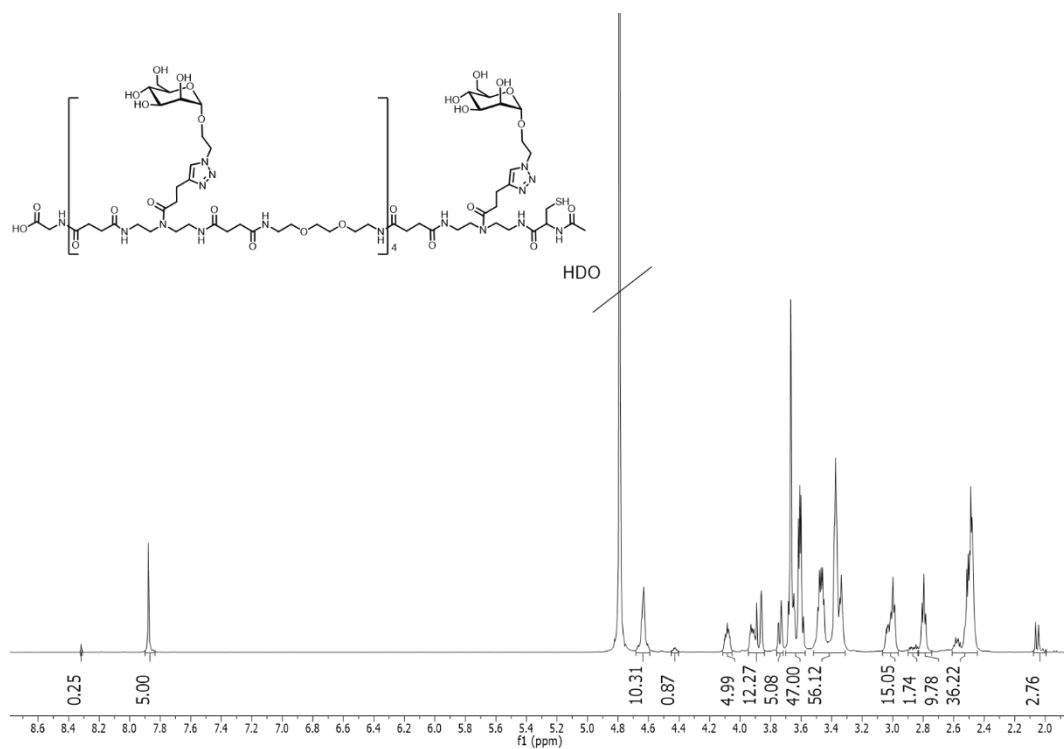

Figure S8.  $^1\text{H-NMR}$  (600 MHz,  $\text{D}_2\text{O}$ ) of glycomacromolecule 3.

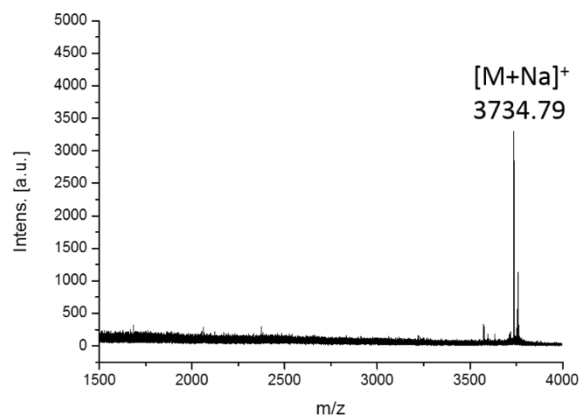

Figure S9. MALDI-TOF-MS spectrum of glycomacromolecule 3.

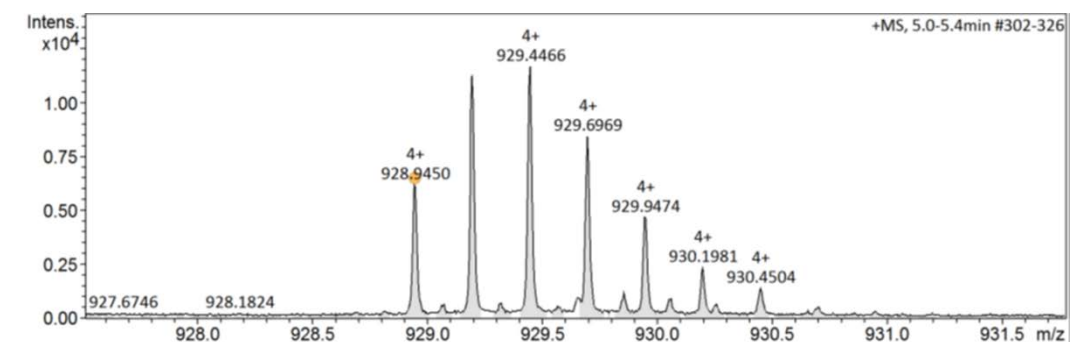

Figure S10. HR-MS (ESI $^+$  Q-TOF) of glycomacromolecule 3.

## 2. Synthesis of *N*-Ethylmaleimide capped Precision Glycomacromolecules

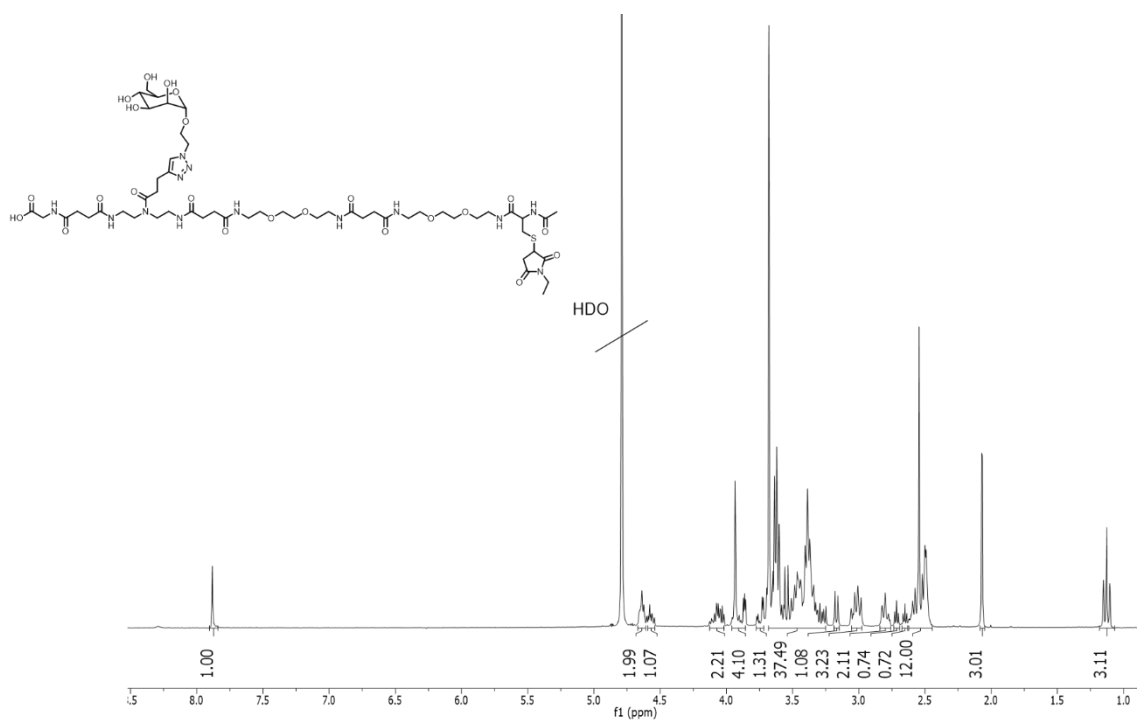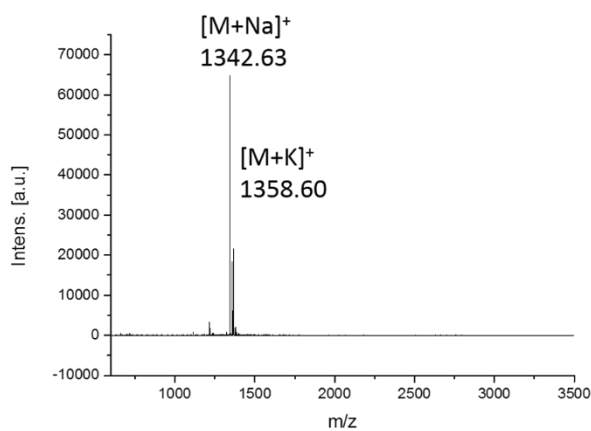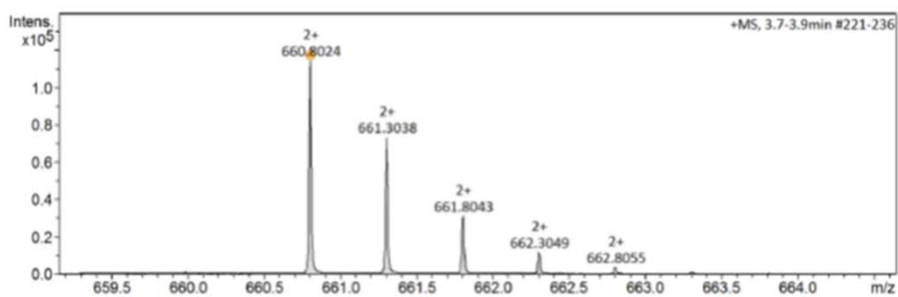

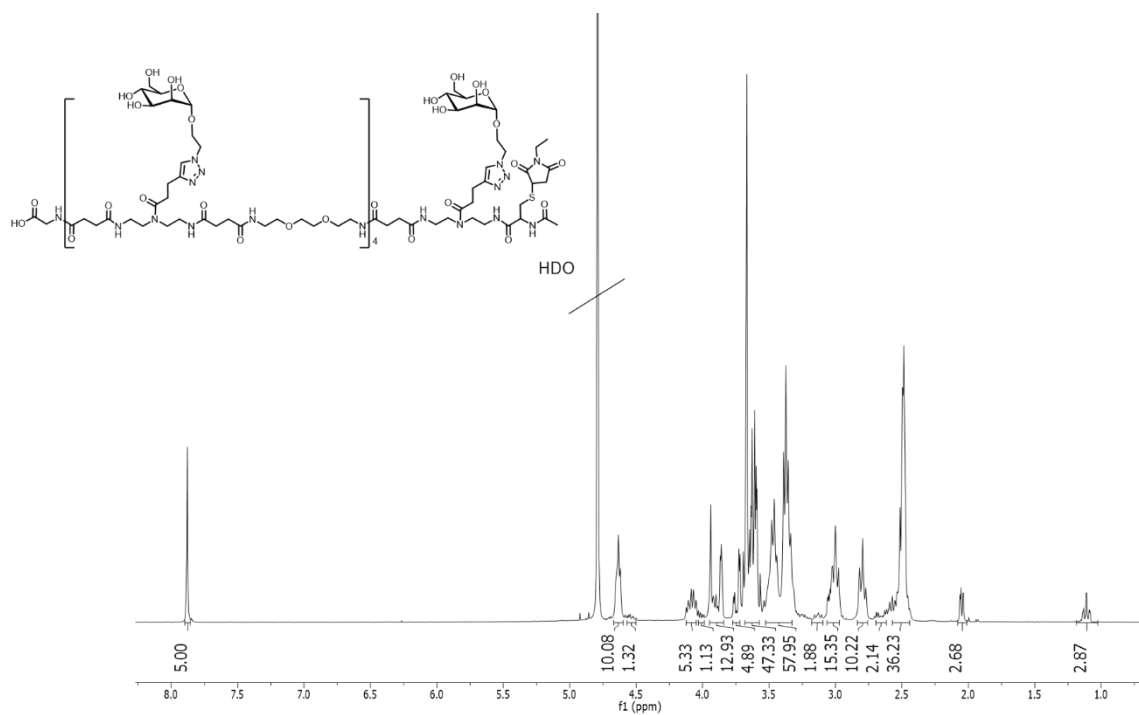

Figure S14.  $^1\text{H-NMR}$  (300 MHz,  $\text{D}_2\text{O}$ ) of glycomacromolecule 3a.

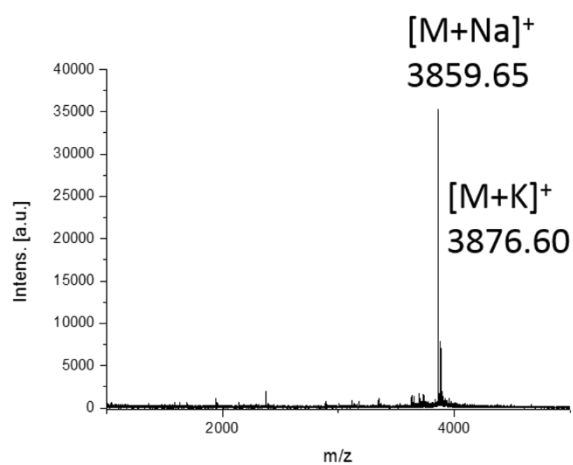

Figure S15. MALDI-TOF-MS spectrum of glycomacromolecule 3a.

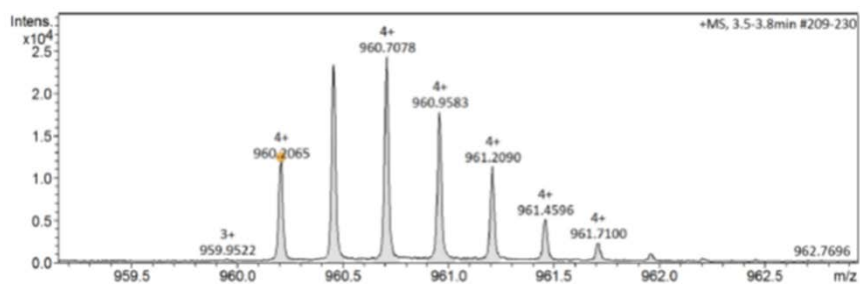

Figure S16. HR-MS ( $\text{ESI}^+$  Q-TOF) of glycomacromolecule 3a.

### 3. Characterization of Citrate Stabilized NPs and Glyco-AuNPs

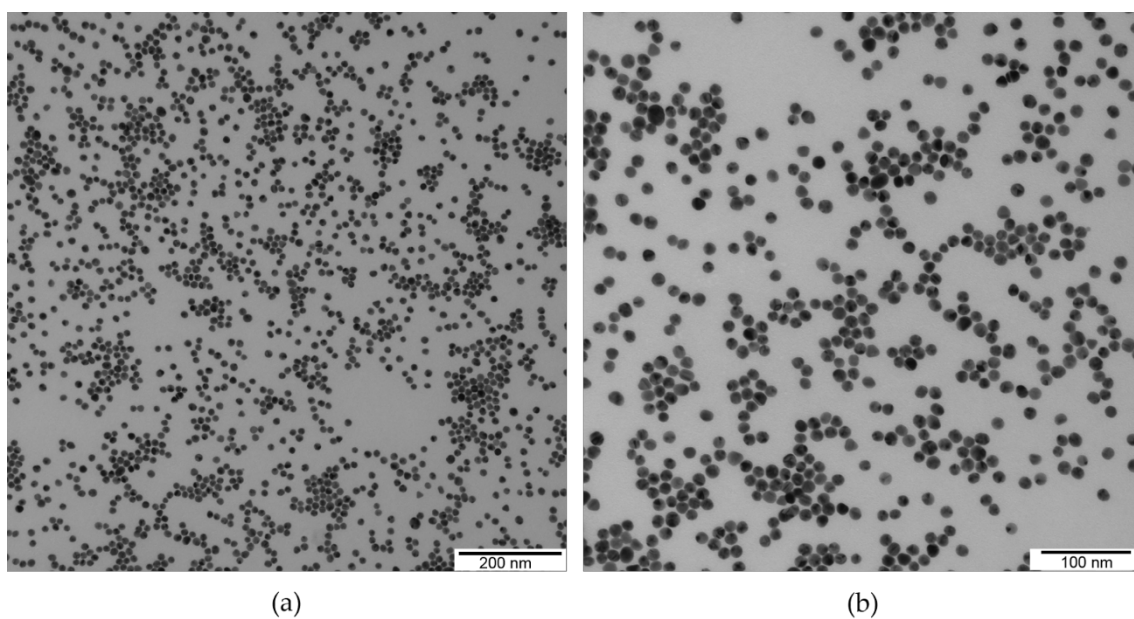

**Figure S17.** TEM images of citrate stabilized gold nanoparticles with different magnifications. The TEM derived diameter is  $14.1 \pm 1.2$  nm.

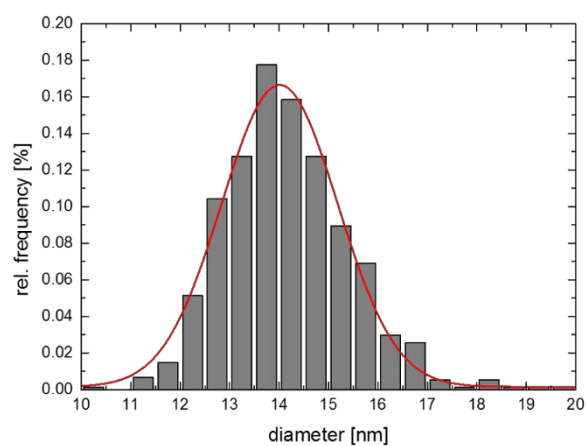

**Figure S18.** TEM derived histogram of citrate stabilized gold nanoparticles.

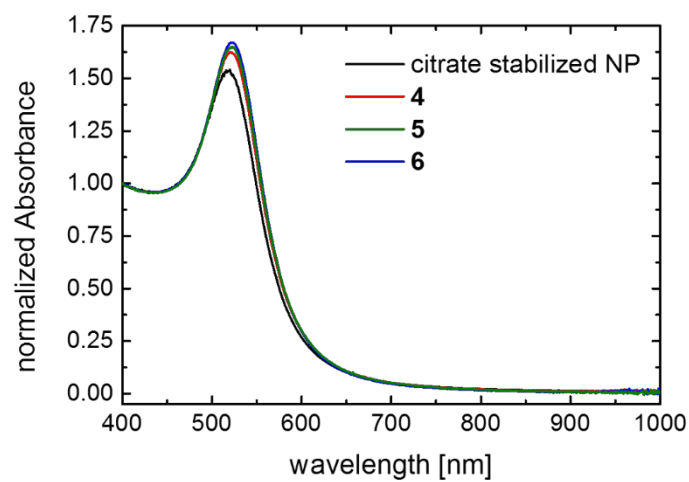

**Figure S19.** UV-Vis absorbance spectra of citrate stabilized AuNPs and glyco-AuNPs 4-6.

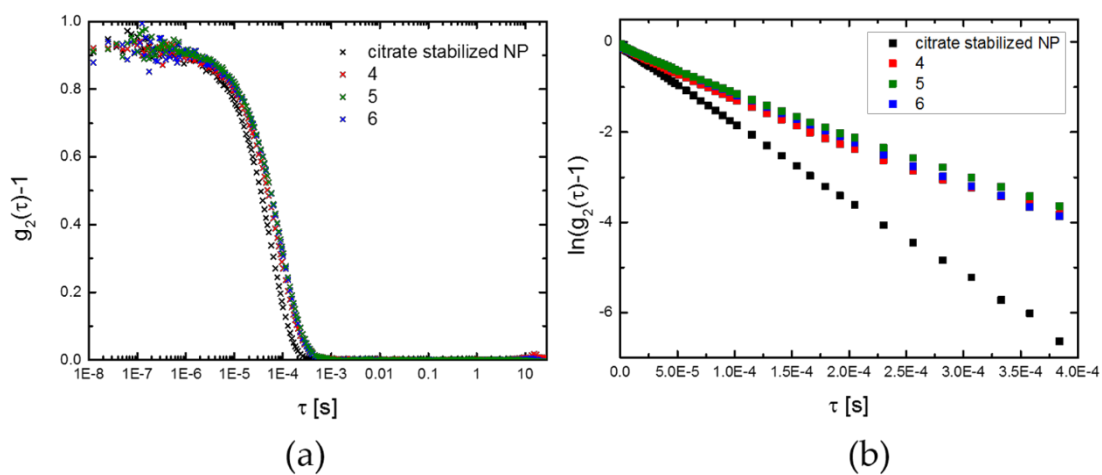

**Figure S20.** (a) Autocorrelation functions and (b) cumulant plot for citrate stabilized NPs and glyco-AuNPs 4-6 in water.



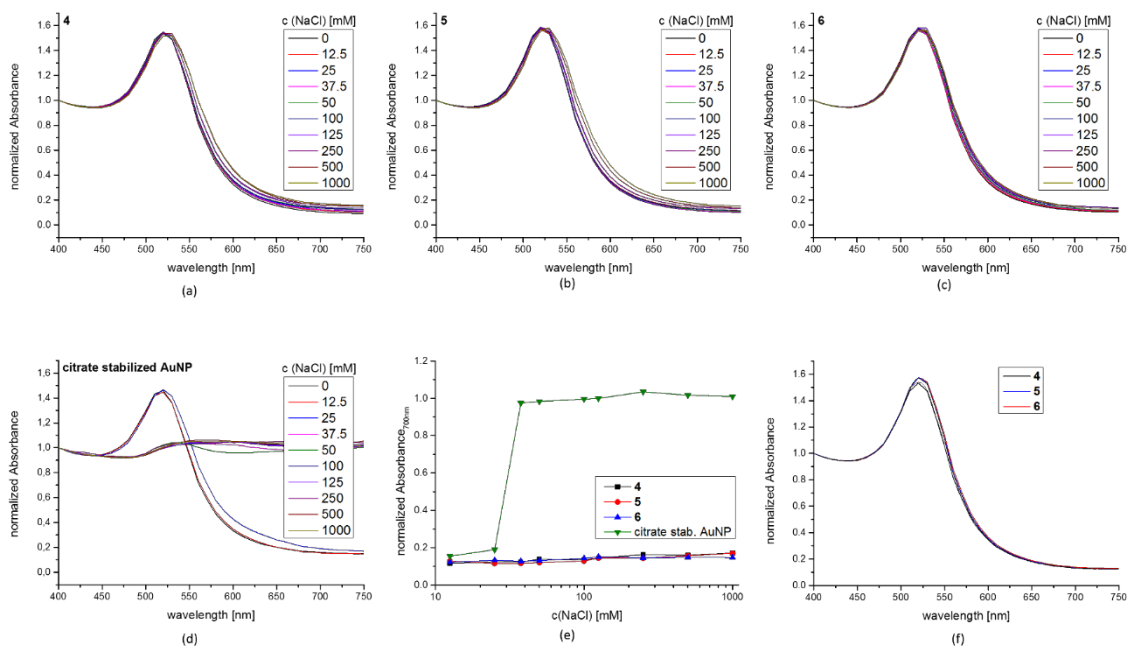

**Figure S21.** Sodium chloride and LBB stability of citrate stabilized AuNPs and Glyco-AuNPs 4-6: UV-Vis absorbance spectra of glyco Au-NPs 4 (a), 5 (b), 6 (c) and citrate stabilized AuNPs (d) with increasing sodium chloride concentration after 24 h; (e) normalized absorbance (normalized to absorbance at 400 nm) at 700 nm in dependence of sodium chloride concentration for citrate stabilized AuNPs and Glyco-AuNPs 4-6; (f) UV-Vis spectra of glyco-AuNPs 4-6 in water and LBB after 24 h.

#### 4. Binding Studies with the Model Lectin Concanavalin A (Con A)

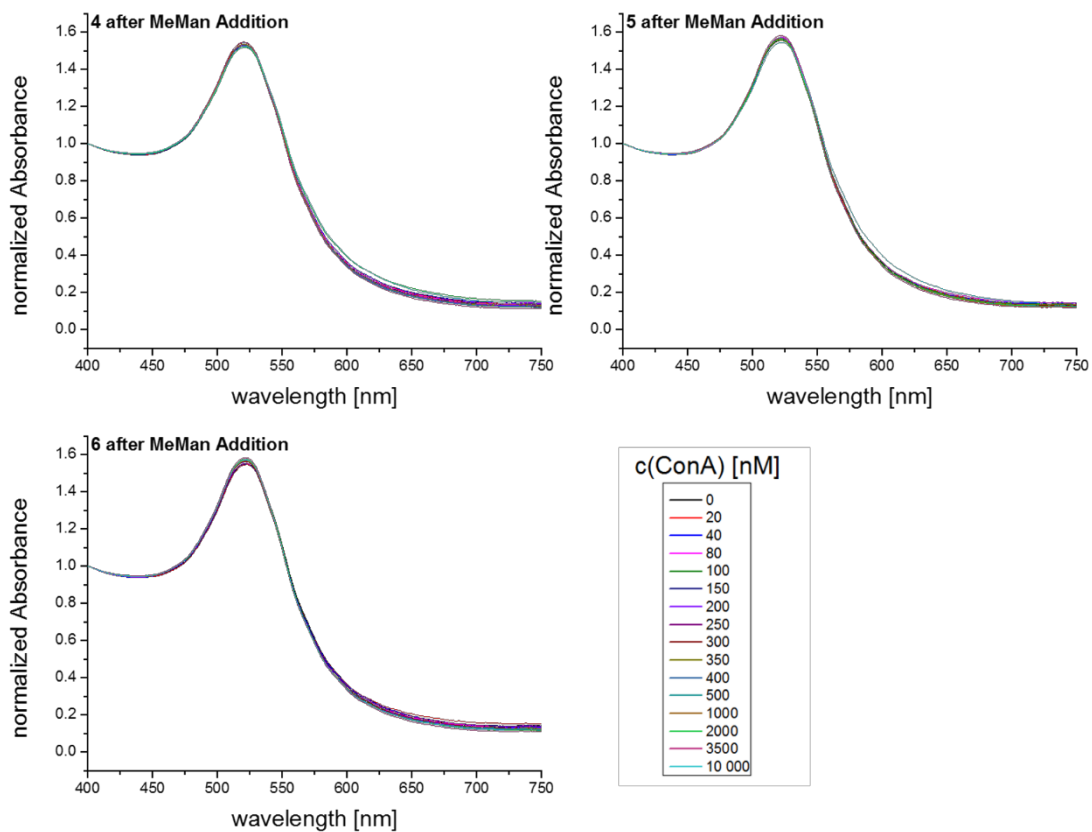

**Figure S22.** UV-Vis absorbance spectra of glyco-AuNPs 4-6 at serial dilutions of Con A after addition of  $\alpha$ MeMan in final concentration of 60 mM.

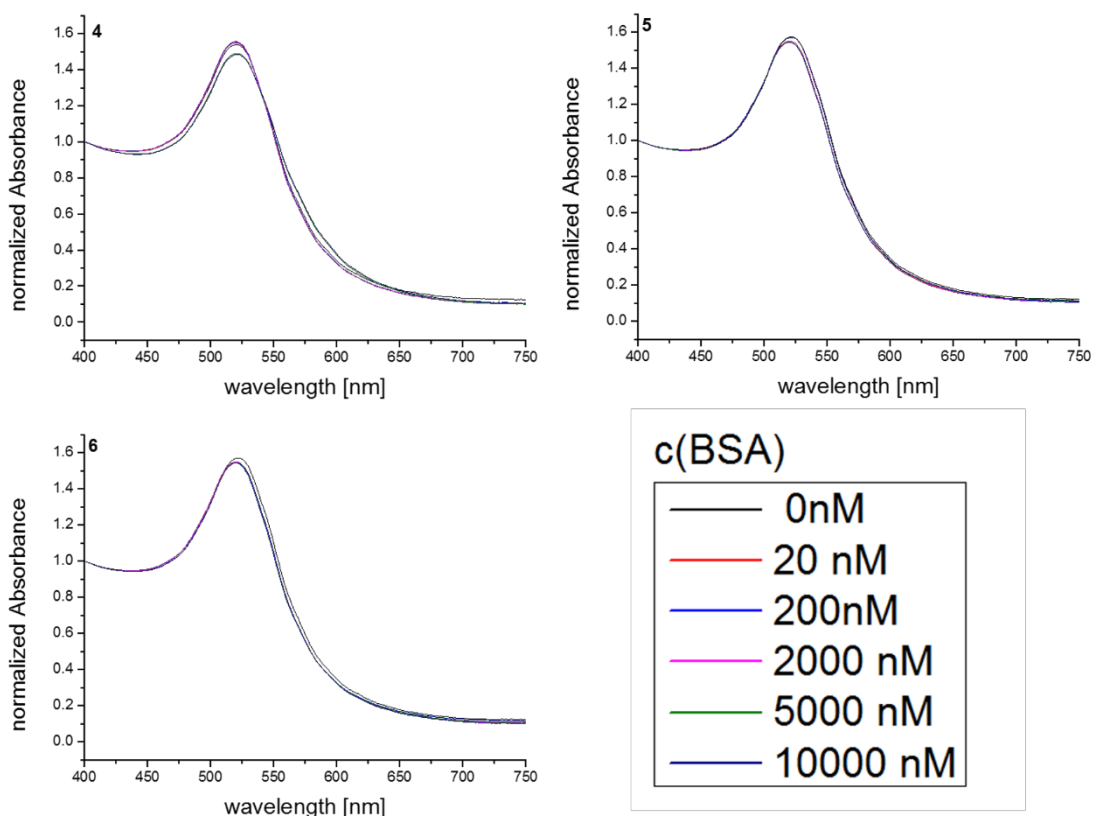

**Figure S23.** UV-Vis absorbance spectra of glyco-AuNPs 4-6 at serial dilutions of BSA.

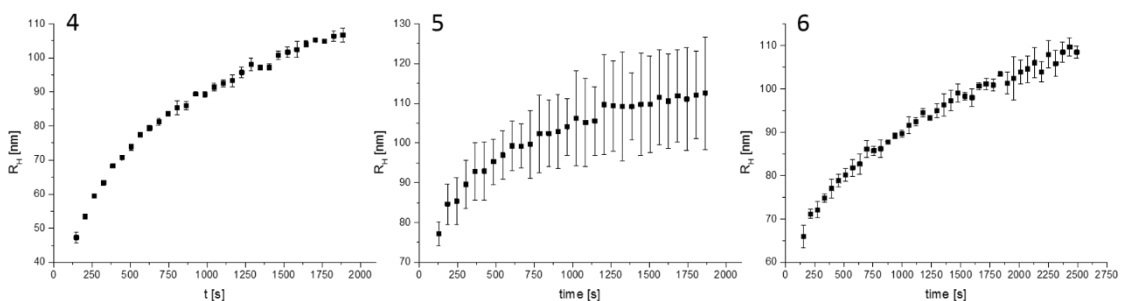

**Figure S24.** Kinetic analysis of glyco-AuNP interaction with Con A by DLS measurements at  $K_{D,app}$  concentration of Con A for glyco-AuNP 4, 5 and 6. The average of three independent measurements is shown and the error bars correspond to the standard deviation in  $R_H$ . The error bars of the time are in the range of the symbol size.

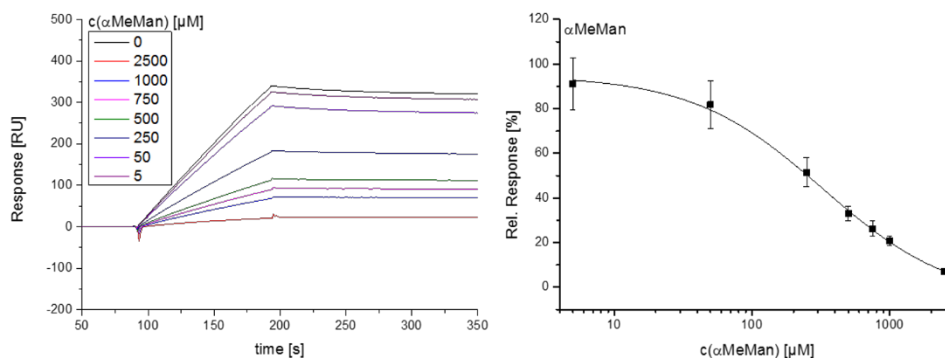

**Figure S25.** Exemplary SPR sensorgram for solutions of 100 nM Con A incubated with serial dilutions of  $\alpha$ MeMan and the resulting  $IC_{50}$  curve fitted to Hill1 function.

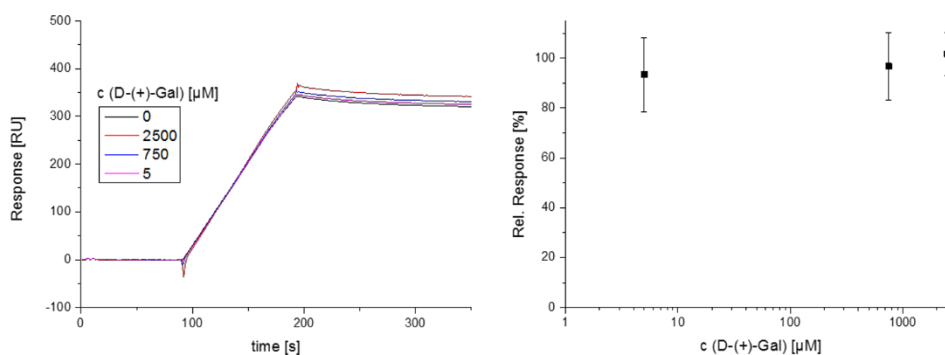

**Figure S26.** Exemplary SPR sensorgram for solutions of 100 nM Con A incubated with three representative concentrations of D-(+)-galactose and the resulting relative response plotted against D-(+)-galactose concentration.

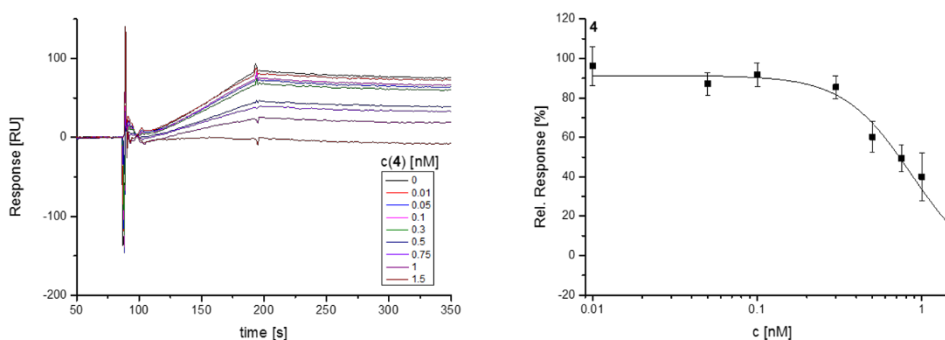

**Figure S27.** Exemplary SPR sensorgram for solutions of 100 nM Con A incubated with serial dilutions of glyco-AuNP 4 and the resulting  $IC_{50}$  curve fitted to Hill1 function.

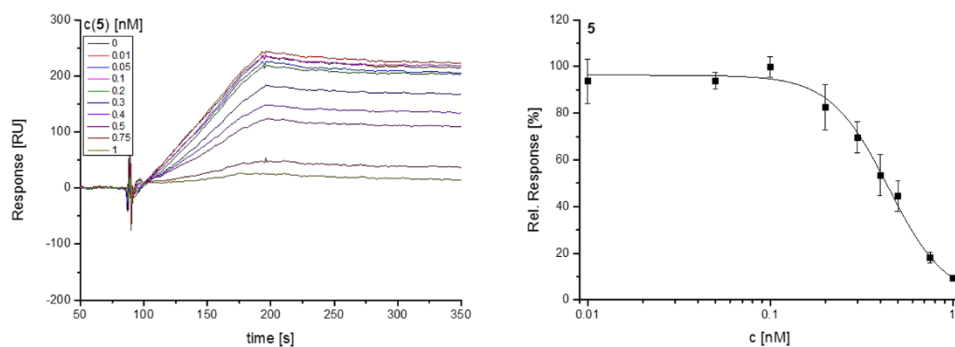

**Figure S28.** Exemplary SPR sensorgram for solutions of 100 nM Con A incubated with serial dilutions of glyco-AuNP 5 and the resulting  $IC_{50}$  curve fitted to Hill1 function.

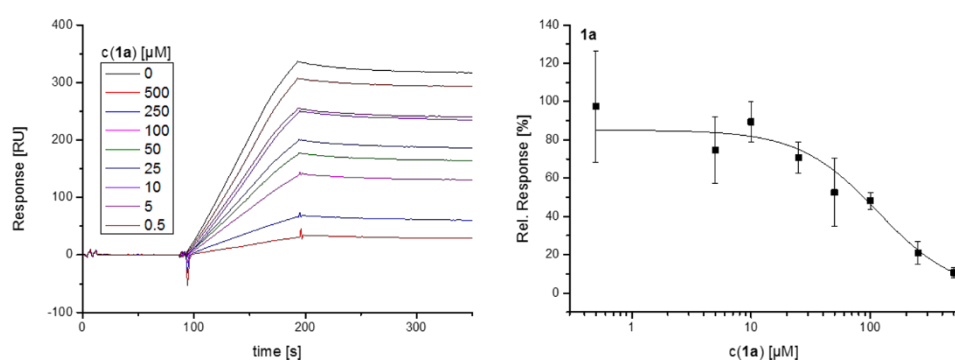

**Figure S29.** Exemplary SPR sensorgram for solutions of 100 nM Con A incubated with serial dilutions of *N*-ethylmaleimide capped glycomacromolecule 1a and the resulting  $IC_{50}$  curve fitted to Hill1 function.

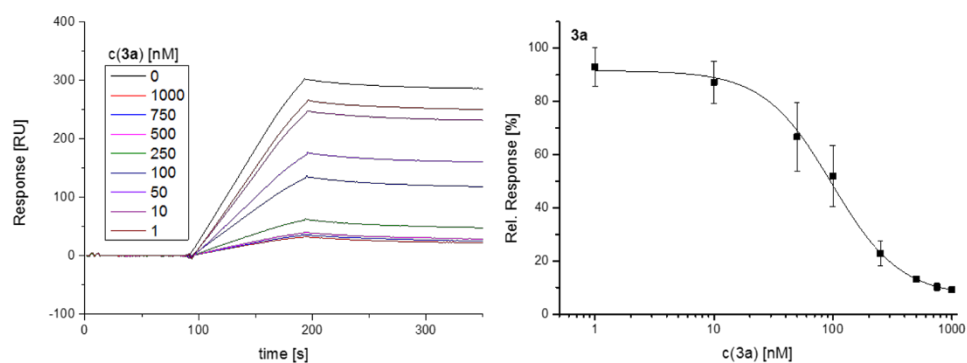

**Figure S30.** Exemplary SPR sensorgram for solutions of 100 nM Con A incubated with serial dilutions of *N*-ethylmaleimide capped glycomacromolecule 3a and the resulting  $IC_{50}$  curve fitted to Hill1 function.
